# Supplementary material
Source: publisher figshare collection journal article supplement (https://gsajournals.figshare.com/articles/dataset/_/7124963)

# Average $r^2$ between sites over 100kb apart

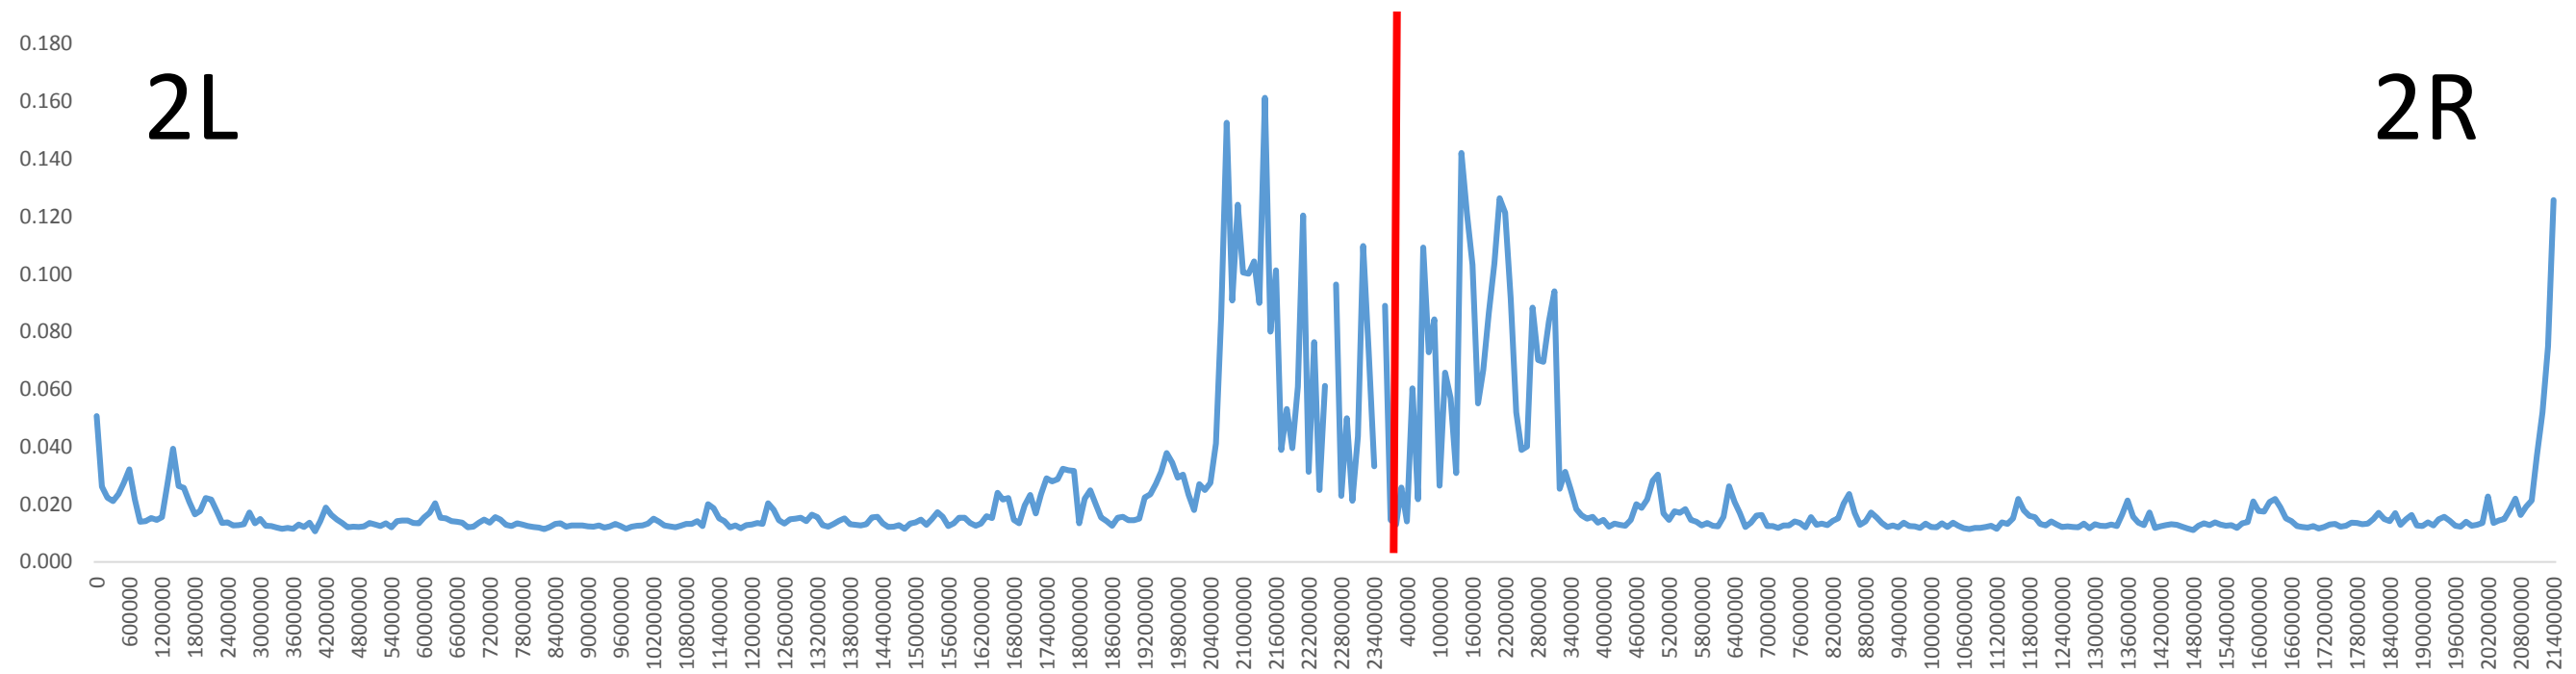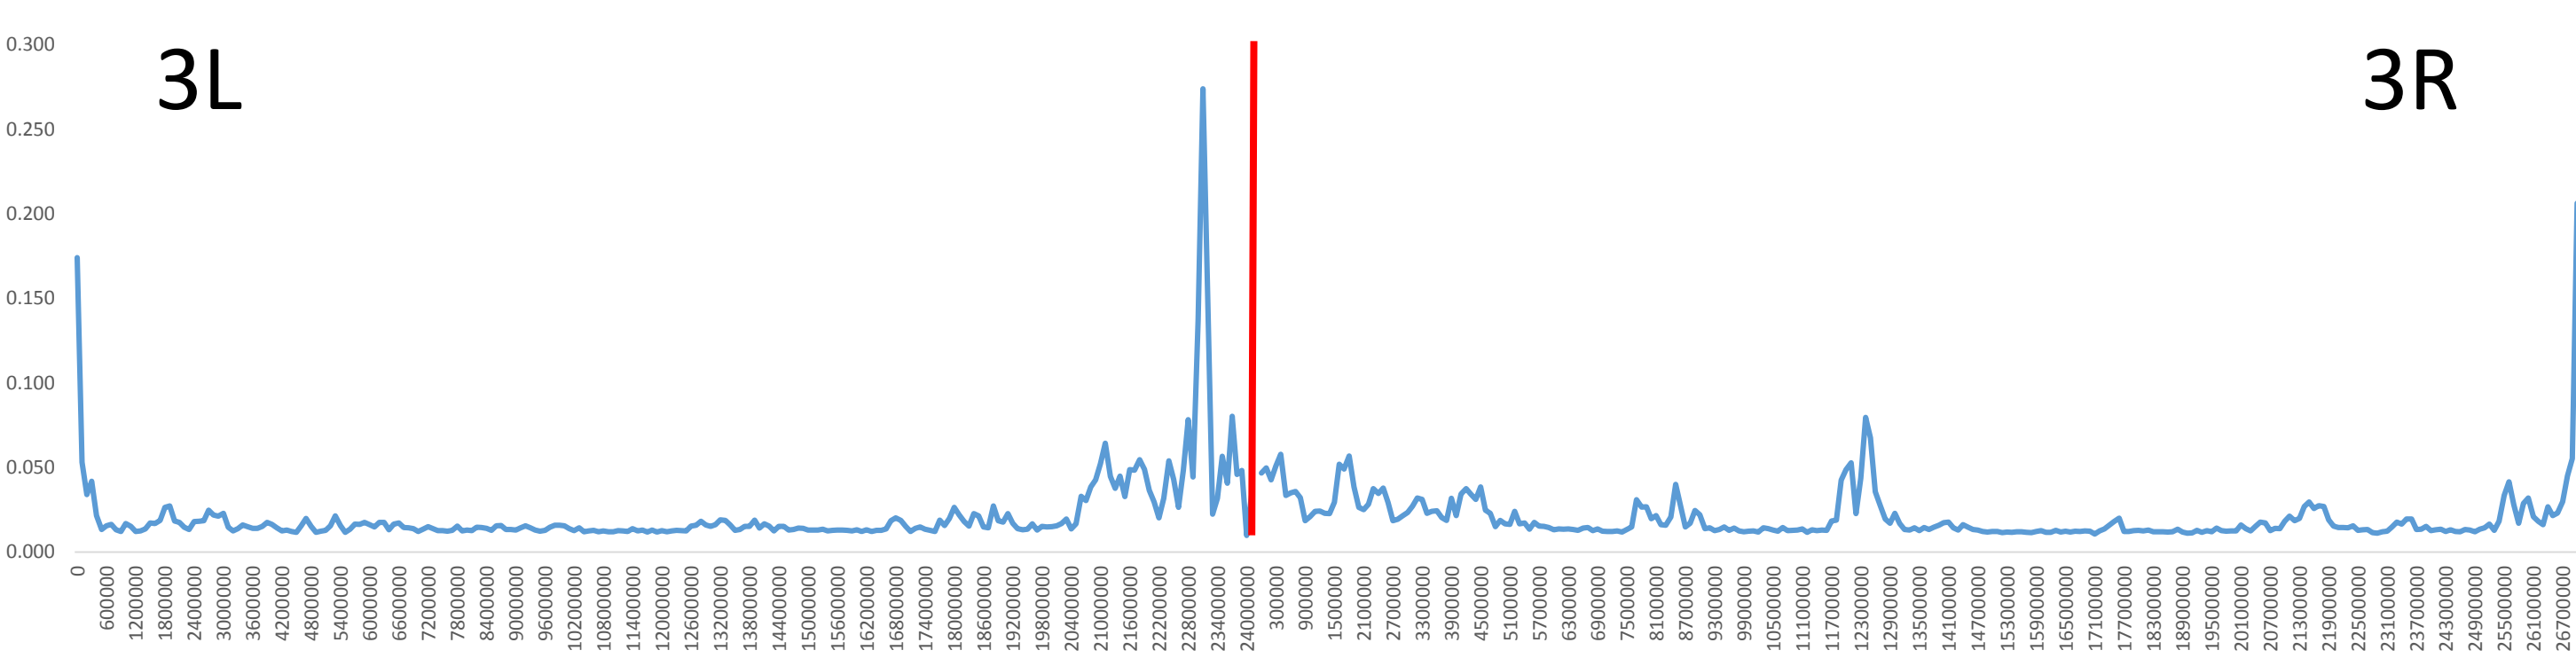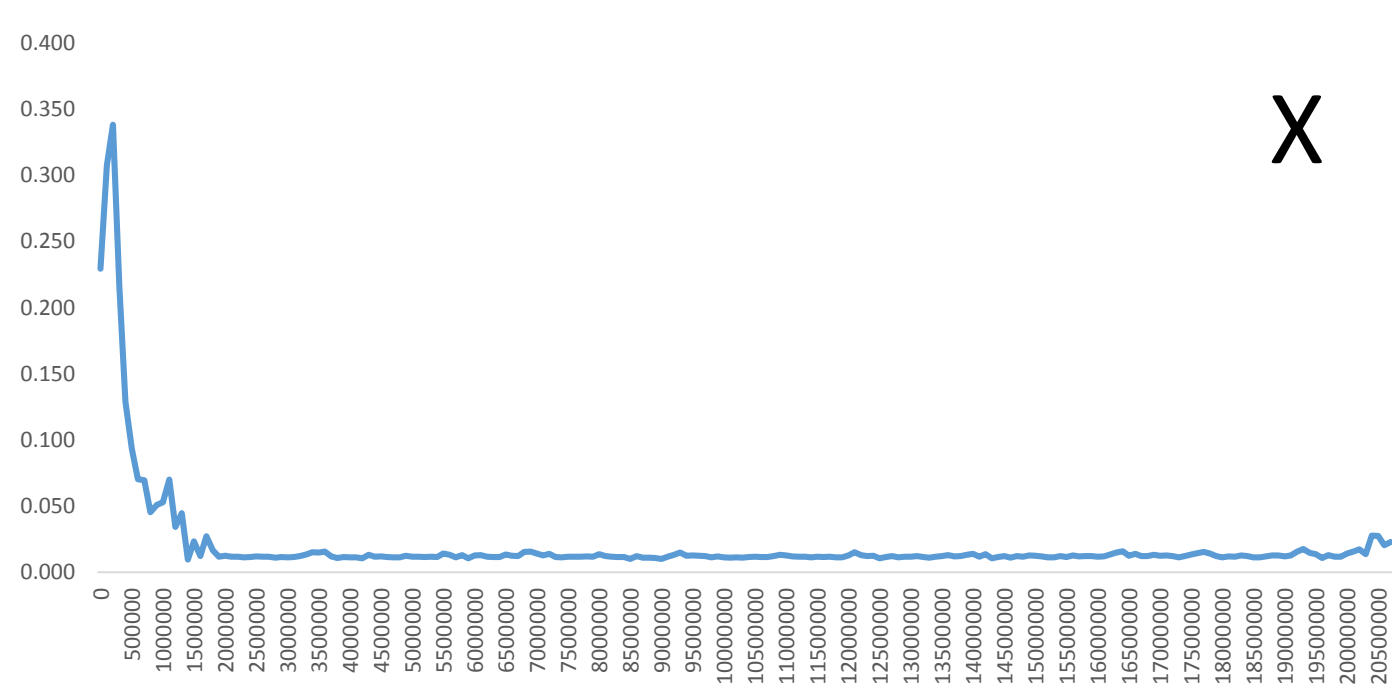

Supplement: Supplementary file 1 [file 1]
